# Supplementary material
Source: publisher figshare collection journal article supplement (https://acs.figshare.com/ndownloader/files/5754864)

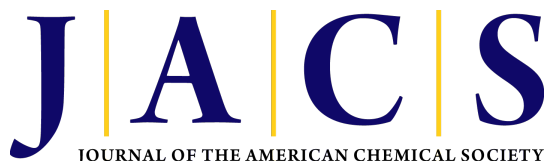

JOURNAL OF THE AMERICAN CHEMICAL SOCIETY

J. Am. Chem. Soc., 1997, 119(30), 7161-7162, DOI:[10.1021/ja970687w](https://doi.org/10.1021/ja970687w)

#### Terms & Conditions

Electronic Supporting Information files are available without a subscription to ACS Web Editions. The American Chemical Society holds a copyright ownership interest in any copyrightable Supporting Information. Files available from the ACS website may be downloaded for personal use only. Users are not otherwise permitted to reproduce, republish, redistribute, or sell any Supporting Information from the ACS website, either in whole or in part, in either machine-readable form or any other form without permission from the American Chemical Society. For permission to reproduce, republish and redistribute this material, requesters must process their own requests via the RightsLink permission system. Information about how to use the RightsLink permission system can be found at <http://pubs.acs.org/page/copyright/permissions.html>

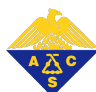

ACS Publications

MOST TRUSTED. MOST CITED. MOST READ.

Copyright © 1997 American Chemical Society

## Influence Of Phospholipid Chirality On Nearest-Neighbor Interactions Within Fluid Bilayers

**Minoru Inagaki, Motonari Shibakami, and Steven L. Regen\***

*Contribution from the Department of Chemistry and Zettlemoyer Center for Surface Studies, Lehigh University, Bethlehem, Pennsylvania 18015*

### Supporting Information

#### **Digestion of Large Unilamellar Vesicles By Phospholipase A<sub>2</sub>.**

Typically, a vesicle dispersion was prepared using 0.6  $\mu\text{mol}$  of each of the homodimers derived from 14<sup>D</sup> and 18<sup>L</sup> in 1 mL of 10 mM borate buffer (pH 7.4, 140 mM NaCl, 2 mM NaN<sub>3</sub>, 1 mM CaCl<sub>2</sub>). Subsequent addition of bovine serum albumin (8 mg in 200  $\mu\text{L}$  of buffer), followed by heating at 60°C for 15 min with stirring, and addition of Phospholipase A<sub>2</sub> (*Naja naja*, 0.3 units in 12  $\mu\text{L}$  of buffer) yielded a dispersion whose lability toward the enzyme was monitored as a function of time. Specifically, 25- $\mu\text{L}$  aliquots were withdrawn at different time intervals, spotted as a 4-cm line on silica gel tlc plates (EM Science, 0.25 mm thickness, 5 cm X 14 cm), and eluted with CHCl<sub>3</sub>/CH<sub>3</sub>OH/H<sub>2</sub>O (65/25/4, v/v/v). The bands that corresponded to the homodimers of 14<sup>D</sup> and 18<sup>L</sup> (visualized by spraying with 2',7'-dichlorofluorescein, and detecting with UV light at 365 nm) were then removed and analyzed for phosphorus content after combustion. Specifically, the silica gel that contained the desired phospholipid was placed over a strong flame, after addition of 0.4 mL of 7.5% Mg(NO<sub>3</sub>)<sub>2</sub>·6 H<sub>2</sub>O, until the evolution of a colored vapor ceased. The colorless residue was then suspended in 0.5 mL of 0.1 M HCl and heated to 100°C for 15 min. After cooling to room temperature, 1.7 mL of a molybdenum reagent (made from 1 part of 10% ascorbic acid in water plus 6 parts of 0.5% (NH<sub>4</sub>)<sub>6</sub>Mo<sub>7</sub>O<sub>24</sub>·4 H<sub>2</sub>O in 2 M H<sub>2</sub>SO<sub>4</sub>) was then added. The mixture was vortex mixed,

incubated for 30 min at 45°C, and its absorbance immediately measured at 820 nm.

Appropriate calibration curves were made using the starting phospholipids.

**Figure 1.** Plot of percent of homodimers of (○)14<sup>D</sup> and (△) 18<sup>L</sup> remaining as a function of time of exposure to Phospholipase A<sub>2</sub>.

Figure 1

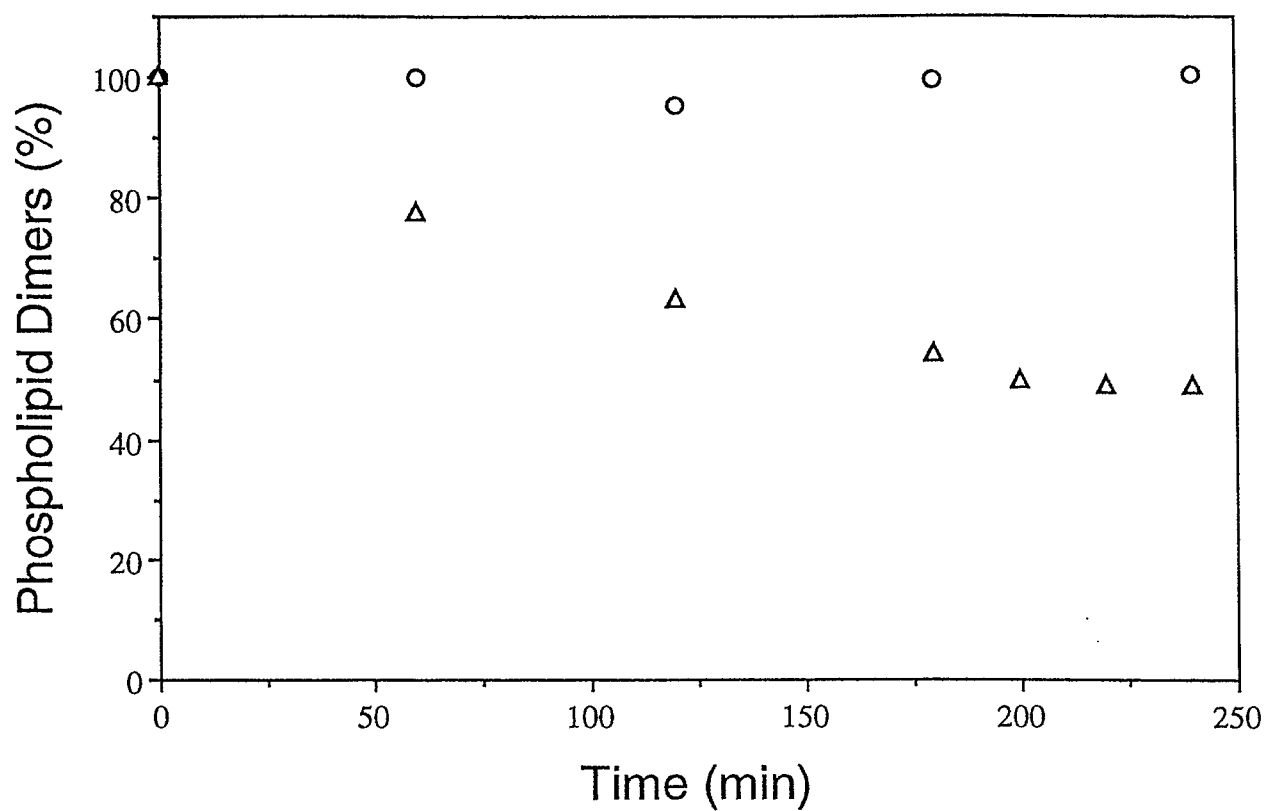

Supplement: Supplementary file 1 [file 5754864]
